# Supplementary material
Source: PubMed Central journal article supplement (PMC4775391)
Supplement: NIHMS754006-supplement-supplemental_material.pdf [file NIHMS754006-supplement-supplemental_material.pdf]

## **Supplemental Material**

## 1. Supplementary Tables

**Table S1.** Distribution of continuous risk markers in the Multi-ethnic Study of Atherosclerosis.

|                                    | <b>Mean (SD)</b> | <b>Median (IQR)</b>  |
|------------------------------------|------------------|----------------------|
| Coronary Artery Calcium Score, AU  | 146.07 (417.21)  | 0 (0, 87.23)         |
| Carotid Intima-Media Thickness, mm | 0.87 (0.19)      | 0.85 (0.74, 0.97)    |
| Flow-Mediated Dilation, % change   | 4.39 (2.86)      | 3.8 (2.3, 6)         |
| Ankle-Brachial Index               | 1.11 (0.12)      | 1.12 (1.05, 1.18)    |
| HsCRP, mg/L                        | 3.78 (5.89)      | 1.92 (0.84, 4.26)    |
| Homocysteine, $\mu\text{mol/L}$    | 9.33 (3.75)      | 8.6 (7.3, 10.5)      |
| NT-ProBNP, pg/mL                   | 102.53 (250.05)  | 54.51 (24.02, 112.5) |

Variables presented as mean (SD) or median (IQR).

AU indicates Agatston Units; HsCRP, High Sensitivity C-Reactive Protein; and NT-ProBNP, N-terminal pro-brain natriuretic peptide.

**Table S2.** Mean diagnostic likelihood ratios (SD) of CAC=0 for coronary heart disease and cardiovascular disease events by racial/ethnic group, adjusted for traditional risk factors and 10-year atherosclerotic cardiovascular disease predicted risk.

|                        | White       | African-American | Hispanic    | Chinese-American |
|------------------------|-------------|------------------|-------------|------------------|
| <b>All CHD Events</b>  |             |                  |             |                  |
| Risk Factors*          | 0.40 (0.11) | 0.48 (0.12)      | 0.46 (0.12) | 0.44 (0.12)      |
| ASCVD Risk†            | 0.33 (0.05) | 0.39 (0.06)      | 0.39 (0.07) | 0.37 (0.06)      |
| <b>Hard CHD Events</b> |             |                  |             |                  |
| Risk Factors*          | 0.50 (0.11) | 0.57 (0.12)      | 0.56 (0.12) | 0.54 (0.12)      |
| ASCVD Risk†            | 0.42 (0.05) | 0.49 (0.06)      | 0.48 (0.07) | 0.46 (0.06)      |
| <b>All CVD Events</b>  |             |                  |             |                  |
| Risk Factors*          | 0.51 (0.11) | 0.59 (0.12)      | 0.57 (0.12) | 0.55 (0.12)      |
| ASCVD Risk†            | 0.43 (0.06) | 0.51 (0.07)      | 0.50 (0.07) | 0.48 (0.07)      |

\* Age, gender, smoking status, diabetes, total and HDL cholesterol, systolic blood pressure, hypertension medication use and race/ethnicity.

† 10-year atherosclerotic cardiovascular disease risk, calculated using the American College of Cardiology / American Heart Association 2013 Pooled Cohort Equations.

CHD indicates coronary heart disease; ASCVD, atherosclerotic cardiovascular disease; and CVD, cardiovascular disease.

**Table S3.** Mean diagnostic likelihood ratios (SD) of hsCRP <1mg/L, hsCRP <3mg/L, CIMT Z score <0, and the combinations CIMT ≤25<sup>th</sup> percentile plus no carotid plaque and CIMT ≤50<sup>th</sup> percentile plus no carotid plaque for coronary heart disease and cardiovascular disease events, adjusted for traditional risk factors and 10-year atherosclerotic cardiovascular disease predicted risk.

|                         | <b>HsCRP<br/>&lt; 1mg/L</b> | <b>HsCRP<br/>&lt; 3mg/L</b> | <b>CIMT<br/>Z score &lt;0</b> | <b>CIMT ≤25th<br/>Percentile + No<br/>Carotid Plaque</b> | <b>CIMT ≤50th<br/>Percentile + No<br/>Carotid Plaque</b> |
|-------------------------|-----------------------------|-----------------------------|-------------------------------|----------------------------------------------------------|----------------------------------------------------------|
| <b>All CHD Events</b>   |                             |                             |                               |                                                          |                                                          |
| Risk Factors*           | 1.00 (0.01)                 | 0.89 (0.04)                 | 0.81 (0.09)                   | 0.68 (0.04)                                              | 0.78 (0.06)                                              |
| ASCVD Risk <sup>†</sup> | 0.99 (0.01)                 | 0.91 (0.02)                 | 0.72 (0.08)                   | 0.49 (0.03)                                              | 0.66 (0.05)                                              |
| <b>Hard CHD Events</b>  |                             |                             |                               |                                                          |                                                          |
| Risk Factors*           | 1.15 (0.04)                 | 0.95 (0.02)                 | 0.88 (0.07)                   | 0.79 (0.03)                                              | 0.82 (0.05)                                              |
| ASCVD Risk <sup>†</sup> | 1.11 (0.02)                 | 0.94 (0.01)                 | 0.80 (0.07)                   | 0.60 (0.03)                                              | 0.69 (0.05)                                              |
| <b>All CVD Events</b>   |                             |                             |                               |                                                          |                                                          |
| Risk Factors*           | 0.97 (0.01)                 | 0.89 (0.04)                 | 0.89 (0.06)                   | 0.82 (0.03)                                              | 0.85 (0.05)                                              |
| ASCVD Risk <sup>†</sup> | 0.93 (0.01)                 | 0.89 (0.03)                 | 0.76 (0.07)                   | 0.62 (0.03)                                              | 0.71 (0.05)                                              |

\* Age, gender, smoking status, diabetes, total and HDL cholesterol, systolic blood pressure, hypertension medication use and race/ethnicity.

<sup>†</sup> 10-year atherosclerotic cardiovascular disease risk, calculated using the American College of Cardiology / American Heart Association 2013 Pooled Cohort Equations.

HsCRP indicates high sensitivity C-reactive protein; CIMT, carotid intima-media thickness; CHD, coronary heart disease; ASCVD, atherosclerotic cardiovascular disease; and CVD, cardiovascular disease.

**Table S4.** Mean diagnostic likelihood ratios (SD) of continuous risk markers, considering a result of less than the study sample median as the threshold for a negative result, for coronary heart disease and cardiovascular disease events, adjusted for traditional risk factors and 10-year atherosclerotic cardiovascular disease predicted risk.

|                                                  | All CHD Events |                         | Hard CHD Events |                         | All CVD Events |                         |
|--------------------------------------------------|----------------|-------------------------|-----------------|-------------------------|----------------|-------------------------|
|                                                  | Risk Factors*  | ASCVD Risk <sup>†</sup> | Risk Factors*   | ASCVD Risk <sup>†</sup> | Risk Factors*  | ASCVD Risk <sup>†</sup> |
| Coronary Artery Calcium Score < 0 AU             | 0.44 (0.12)    | 0.36 (0.07)             | 0.54 (0.12)     | 0.46 (0.07)             | 0.55 (0.12)    | 0.47 (0.07)             |
| Carotid Intima-Media Thickness ≤ 50th Percentile | 0.90 (0.04)    | 0.80 (0.05)             | 0.99 (0.02)     | 0.89 (0.03)             | 0.92 (0.04)    | 0.82 (0.04)             |
| Flow-Mediated Dilatation ≥ 3.8% Change           | 0.94 (0.13)    | 0.94 (0.09)             | 0.83 (0.18)     | 0.80 (0.06)             | 0.94 (0.18)    | 0.93 (0.11)             |
| Ankle-Brachial Index < 1.12                      | 1.15 (0.07)    | 1.08 (0.02)             | 1.16 (0.07)     | 1.11 (0.02)             | 1.12 (0.05)    | 1.09 (0.01)             |
| HsCRP < 1.92 mg/L                                | 0.91 (0.03)    | 0.91 (0.02)             | 0.99 (0.01)     | 0.97 (0.01)             | 0.91 (0.03)    | 0.89 (0.02)             |
| Homocysteine < 8.6 μmol/L                        | 0.94 (0.02)    | 0.84 (0.03)             | 0.85 (0.05)     | 0.77 (0.03)             | 0.94 (0.02)    | 0.86 (0.03)             |
| NT-ProBNP < 54.5 pg/mL                           | 0.80 (0.10)    | 0.88 (0.04)             | 0.72 (0.10)     | 0.76 (0.04)             | 0.82 (0.08)    | 0.86 (0.04)             |

\* Age, gender, smoking status, diabetes, total and HDL cholesterol, systolic blood pressure, hypertension medication use and race/ethnicity.

<sup>†</sup> 10-year atherosclerotic cardiovascular disease risk, calculated using the American College of Cardiology / American Heart Association 2013 Pooled Cohort Equations.

CHD indicates coronary heart disease; CVD, cardiovascular disease; ASCVD, atherosclerotic cardiovascular disease; AU, Agatston units; HsCRP, high sensitivity C-reactive protein; and NT-ProBNP, N-terminal pro-brain natriuretic peptide.

**Table S5.** Traditional risk factor-adjusted diagnostic likelihood ratios of each negative risk marker for coronary heart disease events (all) in specific clinical scenarios.

|                                 | Case 1 | Case 2 | Case 3 | Case 4 | Case 5 | Case 6 | Case 7 | Case 8 | Case 9 |
|---------------------------------|--------|--------|--------|--------|--------|--------|--------|--------|--------|
| CAC=0 AU                        | 0.60   | 0.66   | 0.67   | 0.51   | 0.35   | 0.41   | 0.33   | 0.38   | 0.36   |
| CIMT $\leq$ 25th Percentile     | 0.73   | 0.75   | 0.69   | 0.69   | 0.66   | 0.67   | 0.64   | 0.61   | 0.60   |
| No Carotid Plaque               | 0.96   | 1.01   | 0.92   | 0.87   | 0.87   | 0.79   | 0.79   | 0.79   | 0.79   |
| FMD $\geq$ 5% Change            | 0.68   | 0.94   | 0.83   | 0.92   | 0.84   | 1.14   | 0.92   | 0.86   | 0.92   |
| ABI $>$ 0.9 - $<$ 1.3           | 1.01   | 1.01   | 0.99   | 0.97   | 1.01   | 0.94   | 0.97   | 0.98   | 0.94   |
| HsCRP $<$ 2mg/L                 | 0.89   | 0.87   | 0.83   | 0.84   | 0.93   | 0.82   | 0.84   | 0.83   | 0.87   |
| Homocysteine $<$ 10 $\mu$ mol/L | 1.00   | 1.01   | 1.00   | 1.00   | 0.97   | 0.98   | 0.96   | 0.97   | 0.96   |
| NT-ProBNP $<$ 100pg/mL          | 0.91   | 0.85   | 0.86   | 0.78   | 0.83   | 0.92   | 0.92   | 0.75   | 0.88   |
| No Microalbuminuria             | 0.95   | 0.97   | 0.96   | 0.98   | 0.89   | 0.94   | 0.87   | 0.89   | 0.83   |
| No FH of CHD (any)              | 0.86   | 1.05   | 0.81   | 0.82   | 0.99   | 0.77   | 0.81   | 0.75   | 0.83   |
| No Premature FH of CHD          | 1.07   | 1.08   | 1.02   | 1.00   | 1.25   | 0.93   | 1.07   | 1.15   | 1.23   |
| No Metabolic Syndrome           | 1.00   | 0.85   | 0.85   | 0.88   | 0.88   | 0.78   | 0.83   | 0.77   | -      |
| Healthy Lifestyle               | 1.04   | 0.76   | 0.87   | 0.87   | 0.75   | 0.77   | 0.83   | 0.80   | 0.81   |

**Case 1:** 50-year-old Hispanic woman, non-smoker, SBP 120mmHg (no medication), non-diabetic, HDL-C 60mg/dL, total cholesterol 160mg/dL.

**Case 2:** 50-year-old Chinese American man, non-smoker, SBP 130mmHg (no medication), non-diabetic, HDL-C 40mg/dL, total cholesterol 170mg/dL.

**Case 3:** 55-year-old African American man, non-smoker, SBP 125mmHg (no medication), non-diabetic, HDL-C 40mg/dL, total cholesterol 170mg/dL.

**Case 4:** 60-year-old White man, non-smoker, SBP 130mmHg (no medication), non-diabetic, HDL-C 50mg/dL, total cholesterol 170mg/dL.

**Case 5:** 65-year-old Chinese American woman, non-smoker, SBP 145mmHg on medication, non-diabetic, HDL-C 50mg/dL, total cholesterol 230mg/dL.

**Case 6:** 60-year-old White man, smoker, SBP 135mmHg on medication, non-diabetic, HDL-C 40mg/dL, total cholesterol 200mg/dL.

**Case 7:** 65-year-old Hispanic woman, current smoker, SBP 160mmHg on medication, non-diabetic, HDL-C 45mg/dL, total cholesterol 220mg/dL.

**Case 8:** 75-year-old African American man, non-smoker, SBP 145mmHg on medication, non-diabetic, HDL-C 40mg/dL, total cholesterol 230mg/dL.

**Case 9:** 65-year-old African American man, non-smoker, SBP 140mmHg on medication, diabetic, HDL-C 40mg/dL, total cholesterol 210mg/dL. CAC indicates coronary artery calcium; AU, Agatston units; CIMT, carotid intima-media thickness; FMD, flow-mediated dilation; ABI, ankle-brachial index; HsCRP, high sensitivity C-reactive protein; NT-ProBNP, N-terminal pro-brain natriuretic peptide; FH, family history; CHD, coronary heart disease; SBP, systolic blood pressure; and HDL-C, high density lipoprotein cholesterol.

**Table S6.** Traditional risk factor-adjusted diagnostic likelihood ratios of each negative risk marker for cardiovascular disease events in specific clinical scenarios.

|                                 | Case 1 | Case 2 | Case 3 | Case 4 | Case 5 | Case 6 | Case 7 | Case 8 | Case 9 |
|---------------------------------|--------|--------|--------|--------|--------|--------|--------|--------|--------|
| CAC=0 AU                        | 0.74   | 0.57   | 0.58   | 0.46   | 0.47   | 0.38   | 0.45   | 0.36   | 0.41   |
| CIMT $\leq$ 25th Percentile     | 0.82   | 0.81   | 0.76   | 0.76   | 0.77   | 0.75   | 0.75   | 0.69   | 0.70   |
| No Carotid Plaque               | 0.97   | 0.99   | 0.91   | 0.87   | 0.90   | 0.82   | 0.84   | 0.79   | 0.82   |
| FMD $\geq$ 5% Change            | 0.87   | 0.97   | 0.74   | 0.85   | 1.05   | 1.02   | 1.12   | 0.75   | 0.68   |
| ABI $>$ 0.9 - $<$ 1.3           | 0.96   | 0.97   | 0.96   | 0.95   | 0.96   | 0.94   | 0.94   | 0.95   | 0.92   |
| HsCRP $<$ 2mg/L                 | 0.90   | 0.98   | 0.92   | 0.95   | 0.95   | 0.96   | 0.90   | 0.93   | 0.92   |
| Homocysteine $<$ 10 $\mu$ mol/L | 1.00   | 0.99   | 0.98   | 0.98   | 0.98   | 0.96   | 0.97   | 0.95   | 0.96   |
| NT-ProBNP $<$ 100pg/mL          | 0.93   | 1.05   | 1.03   | 0.94   | 0.88   | 0.87   | 0.77   | 0.91   | 1.00   |
| No Microalbuminuria             | 1.00   | 0.97   | 0.97   | 0.98   | 0.92   | 0.94   | 0.95   | 0.90   | 0.86   |
| No FH of CHD (any)              | 0.79   | 0.91   | 0.77   | 0.75   | 0.80   | 0.71   | 0.73   | 0.68   | 0.72   |
| No Premature FH of CHD          | 1.02   | 1.07   | 0.93   | 0.97   | 1.11   | 0.94   | 1.02   | 0.96   | 0.97   |
| No Metabolic Syndrome           | 0.90   | 0.90   | 0.89   | 0.92   | 0.81   | 0.83   | 0.77   | 0.83   | -      |
| Healthy Lifestyle               | 1.08   | 0.90   | 0.99   | 0.99   | 0.88   | 0.92   | 0.91   | 0.95   | 0.99   |

**Case 1:** 50-year-old Hispanic woman, non-smoker, SBP 120mmHg (no medication), non-diabetic, HDL-C 60mg/dL, total cholesterol 160mg/dL.

**Case 2:** 50-year-old Chinese American man, non-smoker, SBP 130mmHg (no medication), non-diabetic, HDL-C 40mg/dL, total cholesterol 170mg/dL.

**Case 3:** 55-year-old African American man, non-smoker, SBP 125mmHg (no medication), non-diabetic, HDL-C 40mg/dL, total cholesterol 170mg/dL.

**Case 4:** 60-year-old White man, non-smoker, SBP 130mmHg (no medication), non-diabetic, HDL-C 50mg/dL, total cholesterol 170mg/dL.

**Case 5:** 65-year-old Chinese American woman, non-smoker, SBP 145mmHg on medication, non-diabetic, HDL-C 50mg/dL, total cholesterol 230mg/dL.

**Case 6:** 60-year-old White man, smoker, SBP 135mmHg on medication, non-diabetic, HDL-C 40mg/dL, total cholesterol 200mg/dL.

**Case 7:** 65-year-old Hispanic woman, current smoker, SBP 160mmHg on medication, non-diabetic, HDL-C 45mg/dL, total cholesterol 220mg/dL.

**Case 8:** 75-year-old African American man, non-smoker, SBP 145mmHg on medication, non-diabetic, HDL-C 40mg/dL, total cholesterol 230mg/dL.



**Case 9:** 65-year-old African American man, non-smoker, SBP 140mmHg on medication, diabetic, HDL-C 40mg/dL, total cholesterol 210mg/dL. CAC indicates coronary artery calcium; AU, Agatston units; CIMT, carotid intima-media thickness; FMD, flow-mediated dilation; ABI, ankle-brachial index; HsCRP, high sensitivity C-reactive protein; NT-ProBNP, N-terminal pro-brain natriuretic peptide; FH, family history; CHD, coronary heart disease; SBP, systolic blood pressure; and HDL-C, high density lipoprotein cholesterol.

**Table S7.** Beta coefficients used for calculating the diagnostic likelihood ratios of each negative risk marker for coronary heart disease events (all).

|                                        | <b>CAC=0<br/>AU</b> | <b>CIMT ≤ 25th<br/>Percentile</b> | <b>No Carotid<br/>Plaque</b> | <b>FMD ≥ 5%<br/>Change</b> | <b>ABI<br/>&gt; 0.9 - &lt; 1.3</b> | <b>HsCRP<br/>&lt;2mg/L</b> | <b>Homocysteine<br/>&lt; 10μmol/L</b> | <b>NT-ProBNP<br/>&lt; 100pg/mL</b> |
|----------------------------------------|---------------------|-----------------------------------|------------------------------|----------------------------|------------------------------------|----------------------------|---------------------------------------|------------------------------------|
| <b>Age</b>                             | -0.020              | -0.005                            | -0.005                       | -0.001                     | -0.0002                            | 0.001                      | -0.001                                | -0.009                             |
| <b>Male</b>                            | -0.214              | -0.038                            | -0.022                       | -0.065                     | 0.008                              | 0.051                      | -0.018                                | 0.083                              |
| <b>Chinese</b>                         | 0.084               | 0.043                             | 0.105                        | -0.046                     | 0.039                              | 0.051                      | 0.001                                 | -0.020                             |
| <b>Black</b>                           | 0.189               | -0.014                            | 0.041                        | -0.148                     | 0.018                              | -0.010                     | -0.004                                | 0.030                              |
| <b>Hispanic</b>                        | 0.131               | 0.027                             | 0.048                        | -0.160                     | 0.026                              | -0.005                     | 0.001                                 | -0.007                             |
| <b>Smoker</b>                          | -0.089              | 0.002                             | -0.042                       | 0.135                      | -0.023                             | -0.024                     | -0.005                                | 0.117                              |
| <b>SBP</b>                             | -0.001              | -0.0004                           | 0.00001                      | 0.002                      | 0.00002                            | -0.001                     | -0.00002                              | -0.002                             |
| <b>Hypertension<br/>Medication Use</b> | -0.079              | -0.017                            | -0.039                       | 0.023                      | -0.005                             | 0.009                      | -0.012                                | 0.017                              |
| <b>Diabetes</b>                        | -0.071              | -0.024                            | -0.024                       | 0.127                      | -0.054                             | -0.002                     | -0.0004                               | 0.001                              |
| <b>HDL-C</b>                           | 0.002               | 0.001                             | 0.001                        | -0.006                     | 0.0001                             | 0.001                      | 0.0002                                | -0.002                             |
| <b>Total<br/>Cholesterol</b>           | -0.001              | -0.0001                           | -0.0004                      | -0.0003                    | -0.00004                           | -0.0001                    | -0.00004                              | 0.001                              |
| <b>Constant</b>                        | 2.104               | 0.441                             | 0.549                        | 0.255                      | 0.176                              | 0.054                      | 0.171                                 | 0.896                              |
| <b>Risk Marker<br/>Coefficient</b>     | <b>-1.380</b>       | <b>-0.495</b>                     | <b>-0.367</b>                | <b>-0.192</b>              | <b>-0.194</b>                      | <b>-0.188</b>              | <b>-0.110</b>                         | <b>-0.419</b>                      |

CAC indicates coronary artery calcium; AU, Agatston units; CIMT, carotid intima-media thickness; FMD, flow-mediated dilation; ABI, ankle-brachial index; HsCRP, high sensitivity C-reactive protein; NT-ProBNP, N-terminal pro-brain natriuretic peptide; SBP, systolic blood pressure; and HDL-C, high density lipoprotein cholesterol.

**Table S7, continued.** Beta coefficients used for calculating the diagnostic likelihood ratios of each negative risk marker for coronary heart disease events (all).

|                                        | No<br>Microalbuminuria | No FH<br>of CHD | No Premature<br>FH of CHD | No Metabolic<br>Syndrome | Healthy<br>Lifestyle |
|----------------------------------------|------------------------|-----------------|---------------------------|--------------------------|----------------------|
| <b>Age</b>                             | -0.001                 | -0.001          | 0.001                     | 0.0003                   | -0.005               |
| <b>Male</b>                            | -0.023                 | 0.024           | 0.032                     | 0.069                    | 0.02                 |
| <b>Chinese</b>                         | -0.025                 | 0.228           | 0.090                     | 0.023                    | -0.115               |
| <b>Black</b>                           | -0.034                 | -0.016          | 0.037                     | 0.010                    | 0.044                |
| <b>Hispanic</b>                        | -0.026                 | 0.017           | 0.052                     | -0.004                   | 0.078                |
| <b>Smoker</b>                          | -0.011                 | -0.004          | -0.113                    | 0.002                    | -0.059               |
| <b>SBP</b>                             | -0.001                 | 0.001           | 0.001                     | -0.001                   | -0.0003              |
| <b>Hypertension<br/>Medication Use</b> | -0.020                 | -0.058          | 0.016                     | -0.054                   | 0.007                |
| <b>Diabetes</b>                        | -0.073                 | 0.064           | 0.071                     | -0.090                   | -0.036               |
| <b>HDL-C</b>                           | -0.0004                | -0.0001         | 0.001                     | 0.005                    | 0.007                |
| <b>Total<br/>Cholesterol</b>           | -0.0002                | -0.0004         | 0.001                     | -0.0004                  | 0.0003               |
| <b>Constant</b>                        | 0.507                  | 0.330           | -0.154                    | 0.083                    | -0.042               |
| <b>Risk Marker<br/>Coefficient</b>     | <b>-0.282</b>          | <b>-0.521</b>   | <b>-0.252</b>             | <b>-0.284</b>            | <b>-0.182</b>        |

FH indicates family history; CHD, coronary heart disease; SBP, systolic blood pressure; and HDL-C, high density lipoprotein cholesterol.

**Table S8.** Beta coefficients used for calculating the diagnostic likelihood ratios of each negative risk marker for hard coronary heart disease events.

|                                        | CAC=0<br>AU   | CIMT ≤ 25th<br>Percentile | No Carotid<br>Plaque | FMD ≥ 5%<br>Change | ABI<br>> 0.9 - < 1.3 | HsCRP<br><2mg/L | Homocysteine<br>< 10μmol/L | NT-ProBNP<br>< 100pg/mL |
|----------------------------------------|---------------|---------------------------|----------------------|--------------------|----------------------|-----------------|----------------------------|-------------------------|
| <b>Age</b>                             | -0.016        | -0.002                    | -0.004               | -0.003             | -0.001               | 0.001           | -0.003                     | -0.009                  |
| <b>Male</b>                            | -0.170        | -0.035                    | -0.017               | -0.329             | -0.006               | 0.007           | -0.035                     | 0.094                   |
| <b>Chinese</b>                         | 0.074         | 0.032                     | 0.088                | -0.087             | 0.060                | 0.018           | 0.001                      | 0.065                   |
| <b>Black</b>                           | 0.149         | -0.018                    | 0.028                | -0.117             | 0.023                | 0.007           | -0.009                     | 0.110                   |
| <b>Hispanic</b>                        | 0.108         | 0.027                     | 0.057                | -0.178             | 0.027                | 0.002           | 0.003                      | 0.023                   |
| <b>Smoker</b>                          | -0.070        | 0.011                     | -0.033               | 0.024              | -0.020               | 0.005           | -0.011                     | -0.205                  |
| <b>SBP</b>                             | -0.001        | 0.0002                    | 0.0004               | -0.0003            | 0.0001               | -0.0002         | -0.0001                    | -0.003                  |
| <b>Hypertension<br/>Medication Use</b> | -0.065        | -0.015                    | -0.025               | -0.124             | -0.004               | 0.007           | -0.024                     | 0.007                   |
| <b>Diabetes</b>                        | -0.056        | -0.020                    | -0.035               | 0.080              | -0.087               | -0.0001         | -0.001                     | 0.056                   |
| <b>HDL-C</b>                           | 0.002         | -0.0003                   | 0.001                | -0.013             | -0.0003              | 0.0002          | 0.0003                     | -0.002                  |
| <b>Total<br/>Cholesterol</b>           | -0.001        | 0.0001                    | -0.0004              | 0.0002             | 0.00003              | 0.0001          | -0.0001                    | 0.001                   |
| <b>Constant</b>                        | 1.702         | 0.174                     | 0.391                | 1.193              | 0.466                | -0.021          | 0.332                      | 1.283                   |
| <b>Risk Marker<br/>Coefficient</b>     | <b>-1.064</b> | <b>-0.206</b>             | <b>-0.272</b>        | <b>-0.328</b>      | <b>-0.426</b>        | <b>-0.053</b>   | <b>-0.216</b>              | <b>-0.641</b>           |

CAC indicates coronary artery calcium; AU, Agatston units; CIMT, carotid intima-media thickness; FMD, flow-mediated dilation; ABI, ankle-brachial index; HsCRP, high sensitivity C-reactive protein; NT-ProBNP, N-terminal pro-brain natriuretic peptide; SBP, systolic blood pressure; and HDL-C, high density lipoprotein cholesterol.

**Table S8, continued.** Beta coefficients used for calculating the diagnostic likelihood ratios of each negative risk marker for hard coronary heart disease events.

|                                        | No<br>Microalbuminuria | No FH<br>of CHD | No Premature<br>FH of CHD | No Metabolic<br>Syndrome | Healthy<br>Lifestyle |
|----------------------------------------|------------------------|-----------------|---------------------------|--------------------------|----------------------|
| <b>Age</b>                             | -0.001                 | -0.001          | 0.00003                   | 0.0004                   | -0.007               |
| <b>Male</b>                            | -0.016                 | 0.012           | 0.013                     | 0.078                    | -0.022               |
| <b>Chinese</b>                         | -0.021                 | 0.229           | 0.048                     | 0.025                    | -0.146               |
| <b>Black</b>                           | -0.034                 | -0.027          | 0.093                     | 0.010                    | 0.018                |
| <b>Hispanic</b>                        | -0.025                 | 0.010           | 0.107                     | -0.005                   | 0.093                |
| <b>Smoker</b>                          | -0.010                 | -0.002          | -0.169                    | 0.0035                   | -0.011               |
| <b>SBP</b>                             | -0.001                 | 0.0004          | -0.001                    | -0.001                   | -0.001               |
| <b>Hypertension<br/>Medication Use</b> | -0.017                 | -0.076          | 0.085                     | -0.058                   | 0.166                |
| <b>Diabetes</b>                        | -0.085                 | 0.042           | -0.022                    | -0.101                   | 0.043                |
| <b>HDL-C</b>                           | 0.00002                | -0.0003         | 0.001                     | 0.006                    | 0.007                |
| <b>Total<br/>Cholesterol</b>           | -0.0001                | -0.001          | 0.002                     | -0.0004                  | 0.001                |
| <b>Constant</b>                        | 0.407                  | 0.316           | 0.095                     | 0.084                    | 0.022                |
| <b>Risk Marker<br/>Coefficient</b>     | <b>-0.253</b>          | <b>-0.464</b>   | <b>-0.206</b>             | <b>-0.322</b>            | <b>-0.039</b>        |

FH indicates family history; CHD, coronary heart disease; SBP, systolic blood pressure; and HDL-C, high density lipoprotein cholesterol.

**Table S9.** Beta coefficients used for calculating the diagnostic likelihood ratios of each negative risk marker for cardiovascular disease events.

|                                        | <b>CAC=0<br/>AU</b> | <b>CIMT ≤ 25th<br/>Percentile</b> | <b>No Carotid<br/>Plaque<sup>†</sup></b> | <b>FMD ≥ 5%<br/>Change</b> | <b>ABI<br/>&gt; 0.9 - &lt; 1.3</b> | <b>HsCRP<br/>&lt;2mg/L</b> | <b>Homocysteine<br/>&lt; 10μmol/L</b> | <b>NT-ProBNP<br/>&lt; 100pg/mL</b> |
|----------------------------------------|---------------------|-----------------------------------|------------------------------------------|----------------------------|------------------------------------|----------------------------|---------------------------------------|------------------------------------|
| <b>Age</b>                             | -0.017              | -0.004                            | -0.005                                   | -7.89x10 <sup>-6</sup>     | 0.0004                             | 0.001                      | -0.001                                | -0.008                             |
| <b>Male</b>                            | -0.175              | -0.015                            | -0.015                                   | -0.194                     | -0.004                             | 0.049                      | -0.014                                | 0.073                              |
| <b>Chinese</b>                         | 0.070               | 0.038                             | 0.089                                    | 0.007                      | 0.025                              | 0.052                      | 0.001                                 | 0.006                              |
| <b>Black</b>                           | 0.155               | -0.010                            | 0.033                                    | -0.256                     | 0.013                              | -0.010                     | -0.003                                | 0.022                              |
| <b>Hispanic</b>                        | 0.110               | 0.011                             | 0.033                                    | -0.052                     | 0.005                              | -0.007                     | 0.002                                 | 0.004                              |
| <b>Smoker</b>                          | -0.071              | 0.012                             | -0.019                                   | 0.071                      | -0.005                             | 0.021                      | -0.002                                | -0.120                             |
| <b>SBP</b>                             | -0.001              | -0.0004                           | 0.0001                                   | 0.0002                     | 0.0001                             | -0.0004                    | -2.7x10 <sup>-6</sup>                 | -0.001                             |
| <b>Hypertension<br/>Medication Use</b> | -0.064              | -0.008                            | -0.026                                   | -0.015                     | 0.009                              | 0.004                      | -0.008                                | -0.004                             |
| <b>Diabetes</b>                        | -0.055              | -0.027                            | -0.024                                   | -0.083                     | -0.040                             | -0.003                     | -0.0001                               | 0.036                              |
| <b>HDL-C</b>                           | 0.001               | 0.001                             | 0.001                                    | -0.012                     | 0.0002                             | 0.001                      | 0.0002                                | -0.002                             |
| <b>Total<br/>Cholesterol</b>           | -0.001              | -0.0001                           | -0.0003                                  | 0.0003                     | -0.0004                            | -0.0001                    | -0.00004                              | 0.001                              |
| <b>Constant</b>                        | 1.714               | 0.337                             | 0.432                                    | 0.792                      | 0.034                              | 0.050                      | 0.133                                 | 0.786                              |
| <b>Risk Marker<br/>Coefficient</b>     | -1.054              | -0.338                            | -0.267                                   | -0.236                     | -0.063                             | -0.196                     | -0.086                                | -0.379                             |

CAC indicates coronary artery calcium; AU, Agatston units; CIMT, carotid intima-media thickness; FMD, flow-mediated dilation; ABI, ankle-brachial index; HsCRP, high sensitivity C-reactive protein; NT-ProBNP, N-terminal pro-brain natriuretic peptide; SBP, systolic blood pressure; and HDL-C, high density lipoprotein cholesterol.

**Table S9, continued.** Beta coefficients used for calculating the diagnostic likelihood ratios of each negative risk marker for cardiovascular disease events.

|                                        | No<br>Microalbuminuria | No FH<br>of CHD | No Premature<br>FH of CHD | No Metabolic<br>Syndrome | Healthy<br>Lifestyle |
|----------------------------------------|------------------------|-----------------|---------------------------|--------------------------|----------------------|
| <b>Age</b>                             | -0.001                 | -0.0004         | -0.002                    | 0.0003                   | -0.002               |
| <b>Male</b>                            | -0.014                 | -0.004          | -0.005                    | 0.064                    | 0.061                |
| <b>Chinese</b>                         | -0.023                 | 0.180           | 0.071                     | 0.022                    | -0.052               |
| <b>Black</b>                           | -0.020                 | 0.014           | -0.047                    | 0.010                    | 0.045                |
| <b>Hispanic</b>                        | -0.019                 | 0.053           | 0.045                     | -0.004                   | 0.057                |
| <b>Smoker</b>                          | -0.009                 | 0.016           | -0.059                    | 0.003                    | -0.05                |
| <b>SBP</b>                             | -0.001                 | 0.0002          | 0.001                     | -0.001                   | -0.0004              |
| <b>Hypertension<br/>Medication Use</b> | -0.021                 | -0.054          | -0.009                    | -0.048                   | 0.067                |
| <b>Diabetes</b>                        | -0.067                 | 0.034           | 0.010                     | -0.084                   | 0.006                |
| <b>HDL-C</b>                           | $7 \times 10^{-6}$     | -0.001          | -0.00004                  | 0.004                    | 0.006                |
| <b>Total<br/>Cholesterol</b>           | -0.0002                | -0.001          | 0.001                     | -0.0003                  | -0.001               |
| <b>Constant</b>                        | 0.508                  | 0.363           | -0.011                    | 0.077                    | -0.011               |
| <b>Risk Marker<br/>Coefficient</b>     | <b>-0.294</b>          | <b>-0.430</b>   | <b>-0.190</b>             | <b>-0.263</b>            | <b>-0.0184</b>       |

FH indicates family history; CHD, coronary heart disease; SBP, systolic blood pressure; and HDL-C, high density lipoprotein cholesterol.

**Table S10.** Net reclassification improvement for CVD events with the 13 negative risk markers in MESA participants with a pre-test 10-year CVD risk  $\geq 5\%$  (N=4,655, including 4,001 participants without events and 654 with events). Reclassification was defined as a post-test risk  $< 5\%$ .

|                                    | Prevalence of risk marker |      | Correct reclassification (non-events) |      | Incorrect reclassification (events) |     | NRI   |
|------------------------------------|---------------------------|------|---------------------------------------|------|-------------------------------------|-----|-------|
|                                    | N                         | %    | N                                     | %    | N                                   | %   |       |
| CAC Score = 0 AU                   | 1,738                     | 37.3 | 702                                   | 17.5 | 24                                  | 3.7 | 13.88 |
| HsCRP < 2 mg/dL                    | 2,324                     | 50.3 | 103                                   | 2.6  | 4                                   | 0.6 | 1.96  |
| Homocysteine < 10 $\mu$ mol/L      | 2,837                     | 61.1 | 86                                    | 2.1  | 4                                   | 0.6 | 1.54  |
| NT-ProBNP < 100pg/mL               | 2,522                     | 65.7 | 92                                    | 2.3  | 3                                   | 0.5 | 1.84  |
| No Microalbuminuria                | 4,058                     | 87.6 | 41                                    | 1.0  | 2                                   | 0.3 | 0.72  |
| Ankle-Brachial Index > 0.9 - < 1.3 | 3,789                     | 82.5 | 97                                    | 2.4  | 4                                   | 0.6 | 1.81  |
| CIMT $\leq$ 25th Percentile        | 680                       | 14.8 | 197                                   | 4.9  | 11                                  | 1.7 | 3.24  |
| No Carotid Plaque                  | 2,261                     | 49.3 | 193                                   | 4.8  | 6                                   | 0.9 | 3.91  |
| FMD $\geq$ 5% Change               | 536                       | 27.3 | 53                                    | 1.3  | 2                                   | 0.3 | 1.02  |
| No Family History of CHD           | 2,402                     | 55.5 | 184                                   | 4.6  | 11                                  | 1.7 | 2.92  |
| No Family History of Premature CHD | 2,859                     | 81.3 | 81                                    | 2.0  | 1                                   | 0.2 | 1.87  |
| No Metabolic Syndrome              | 2,635                     | 56.8 | 152                                   | 3.8  | 4                                   | 0.6 | 3.19  |
| Healthy Lifestyle                  | 902                       | 26.9 | 77                                    | 1.9  | 3                                   | 0.5 | 1.47  |

CVD indicates cardiovascular disease; N, number; NRI, net reclassification improvement; CAC, coronary artery calcium; HsCRP, high sensitivity C-reactive protein; NT-ProBNP, N-terminal pro-brain natriuretic peptide; CIMT, carotid intima-media thickness; FMD, flow mediated dilation; CHD, coronary heart disease.



**Table S11.** Net reclassification improvement for CVD events with the 13 negative risk markers in MESA participants with a pre-test 10-year CVD risk  $\geq 7.5\%$  (N=3,833, including 3,227 participants without events and 606 with events). Reclassification was defined as a post-test 10-year CVD risk  $< 5\%$ .

|                                    | Prevalence of risk marker |      | Correct reclassification (non-events) |     | Incorrect reclassification (events) |     | NRI  |
|------------------------------------|---------------------------|------|---------------------------------------|-----|-------------------------------------|-----|------|
|                                    | N                         | %    | N                                     | %   | N                                   | %   |      |
| CAC Score = 0 AU                   | 1,291                     | 33.6 | 299                                   | 9.3 | 15                                  | 2.5 | 6.79 |
| HsCRP < 2 mg/dL                    | 1,923                     | 50.4 | 0                                     | 0   | 0                                   | 0   | 0.00 |
| Homocysteine < 10 $\mu$ mol/L      | 2,252                     | 58.7 | 0                                     | 0   | 0                                   | 0   | 0.00 |
| NT-ProBNP < 100pg/mL               | 1,992                     | 62.5 | 0                                     | 0   | 0                                   | 0   | 0.00 |
| No Microalbuminuria                | 3,294                     | 86.1 | 0                                     | 0   | 0                                   | 0   | 0.00 |
| Ankle-Brachial Index > 0.9 - < 1.3 | 3,079                     | 81.4 | 0                                     | 0   | 0                                   | 0   | 0.00 |
| CIMT $\leq$ 25th Percentile        | 482                       | 12.7 | 19                                    | 0.6 | 2                                   | 0.3 | 0.26 |
| No Carotid Plaque                  | 1,747                     | 46.2 | 0                                     | 0   | 0                                   | 0   | 0.00 |
| FMD $\geq$ 5% Change               | 379                       | 24.0 | 0                                     | 0   | 0                                   | 0   | 0.00 |
| No Family History of CHD           | 1,970                     | 55.4 | 0                                     | 0   | 0                                   | 0   | 0.00 |
| No Family History of Premature CHD | 2,341                     | 82.0 | 0                                     | 0   | 0                                   | 0   | 0.00 |
| No Metabolic Syndrome              | 2,094                     | 54.6 | 0                                     | 0   | 0                                   | 0   | 0.00 |
| Healthy Lifestyle                  | 738                       | 26.6 | 0                                     | 0   | 0                                   | 0   | 0.00 |

CVD indicates cardiovascular disease; N, number; NRI, net reclassification improvement; CAC, coronary artery calcium; HsCRP, high sensitivity C-reactive protein; NT-ProBNP, N-terminal pro-brain natriuretic peptide; CIMT, carotid intima-media thickness; FMD, flow mediated dilation; CHD, coronary heart disease.

## **2. Supplementary Figures**

**Figure S1.** Risk factor-adjusted diagnostic likelihood ratios of different negative risk markers for coronary heart disease events (all) (A) and cardiovascular disease events (B) in a 50-year-old Hispanic woman, non-smoker, SBP 120mmHg (no medication), non-diabetic, HDL-cholesterol 60mg/dL, total cholesterol 160mg/dL.

**S1.A)** Coronary heart disease events (all)

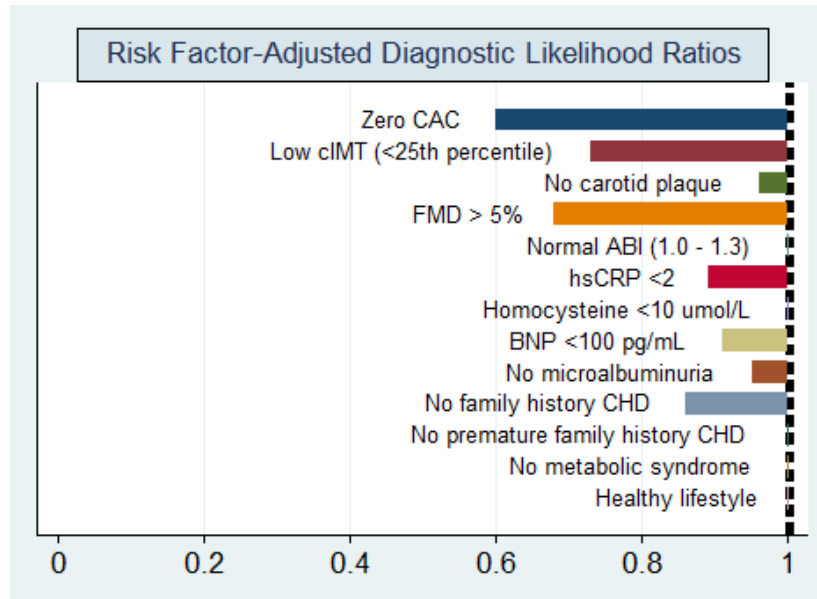

**S1.B)** Cardiovascular disease events

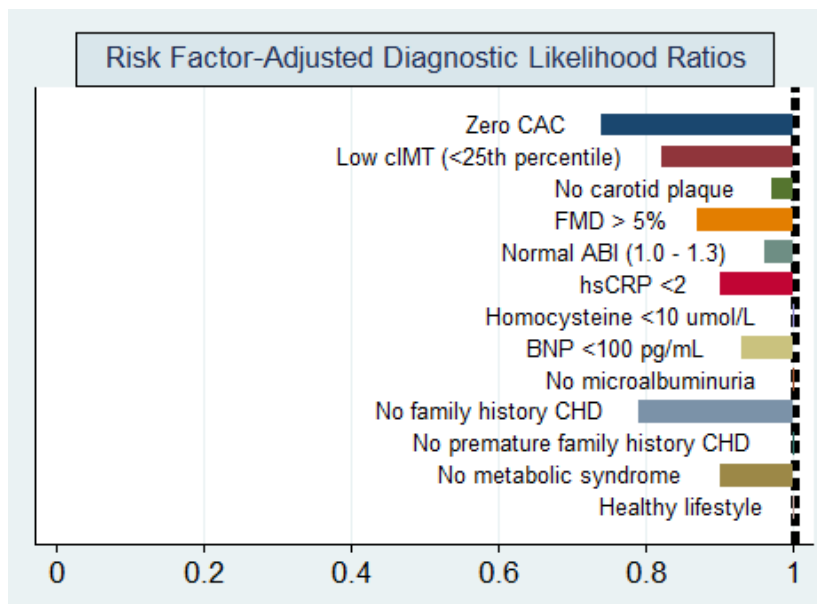

**Figure S2.** Risk factor-adjusted diagnostic likelihood ratios of different negative risk markers for coronary heart disease events (all) (A) and cardiovascular disease events (B) in a 50-year-old Chinese American man, non-smoker, SBP 130mmHg (no medication), non-diabetic, HDL-cholesterol 40mg/dL, total cholesterol 170mg/dL.

**S2.A)** Coronary heart disease events (all)

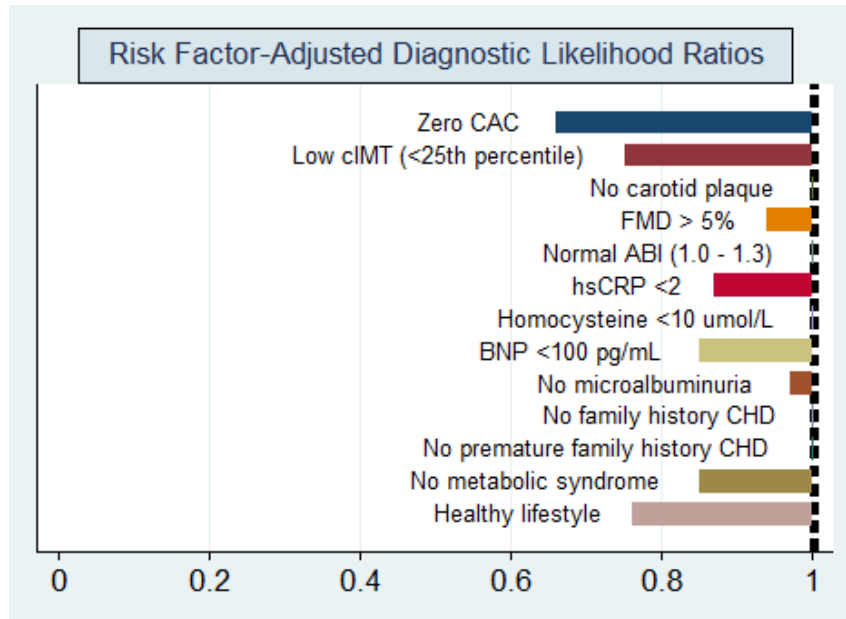

**S2.B)** Cardiovascular disease events

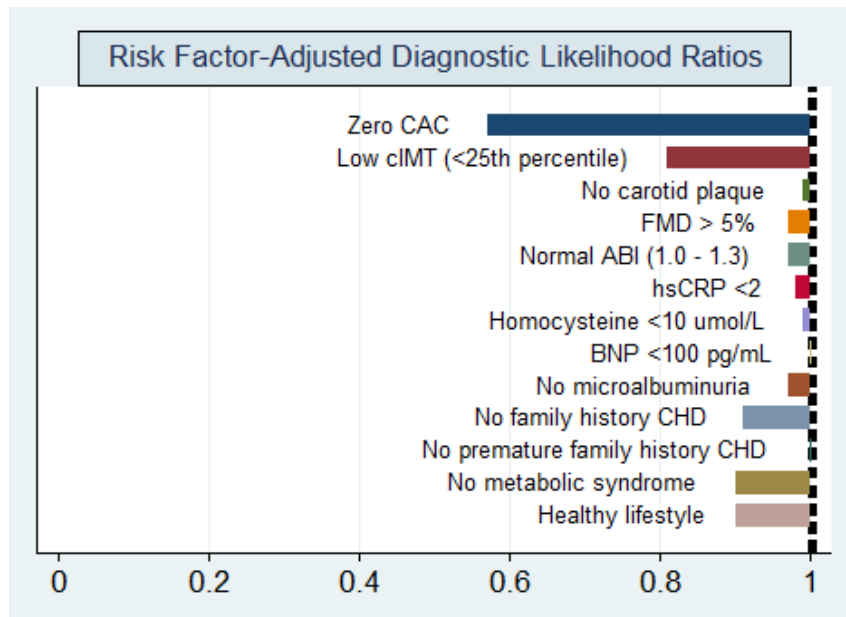

**Figure S3.** Risk factor-adjusted diagnostic likelihood ratios of different negative risk markers for coronary heart disease events (all) (A) and cardiovascular disease events (B) in a 55-year-old African American man, non-smoker, SBP 125mmHg (no medication), non-diabetic, HDL-cholesterol 40mg/dL, total cholesterol 170mg/dL.

**S3.A)** Coronary heart disease events (all)

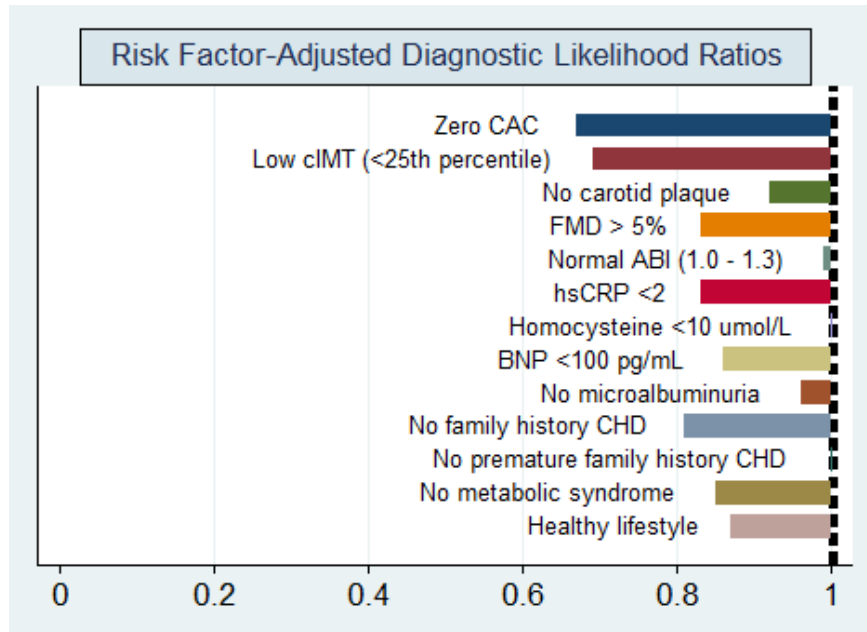

**S3.B)** Cardiovascular disease events

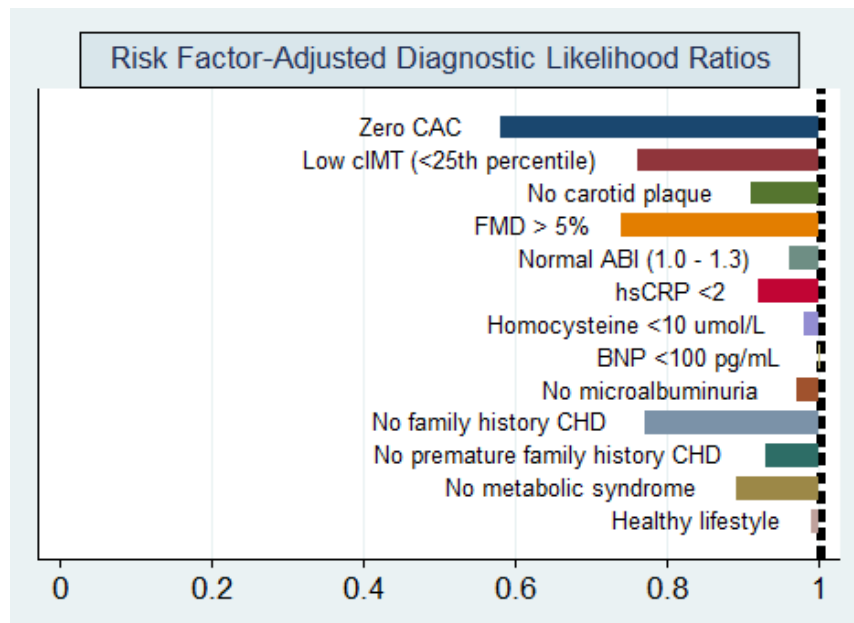

**Figure S4.** Risk factor-adjusted diagnostic likelihood ratios of different negative risk markers for coronary heart disease events (all) (A) and cardiovascular disease events (B) in a 60-year-old White man, non-smoker, SBP 130mmHg (no medication), non-diabetic, HDL-cholesterol 50mg/dL, total cholesterol 170mg/dL.

**S4.A)** Coronary heart disease events (all)

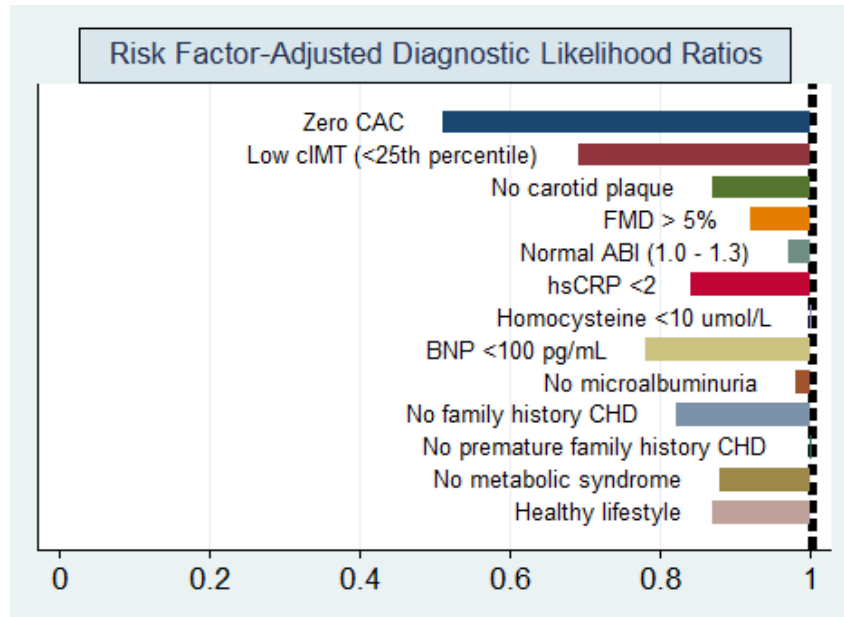

**S4.B)** Cardiovascular disease events

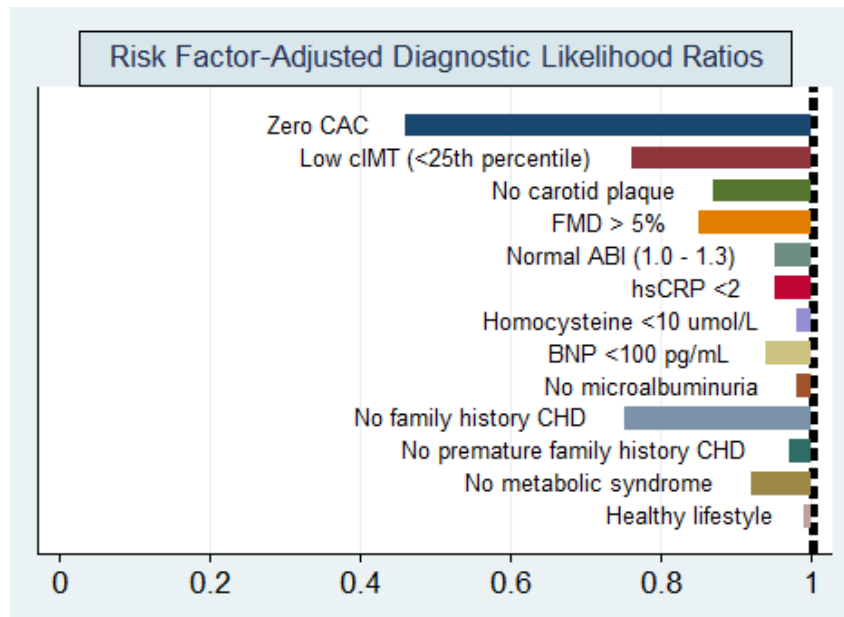

**Figure S5.** Risk factor-adjusted diagnostic likelihood ratios of different negative risk markers for coronary heart disease events (all) (A) and cardiovascular disease events (B) in a 65-year-old Chinese American woman, non-smoker, SBP 145mmHg on medication, non-diabetic, HDL-cholesterol 50mg/dL, total cholesterol 230mg/dL.

**S5.A)** Coronary heart disease events (all)

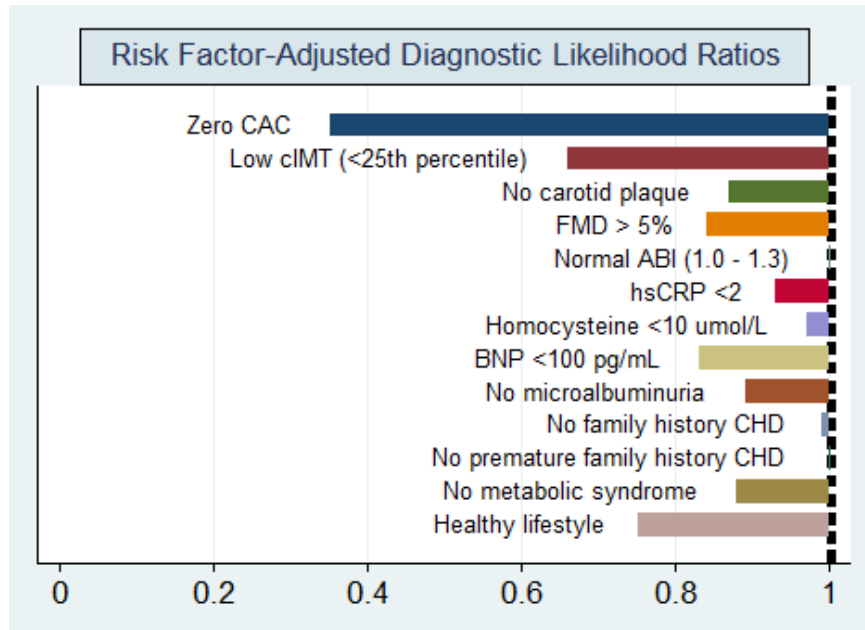

**S5.B)** Cardiovascular disease events

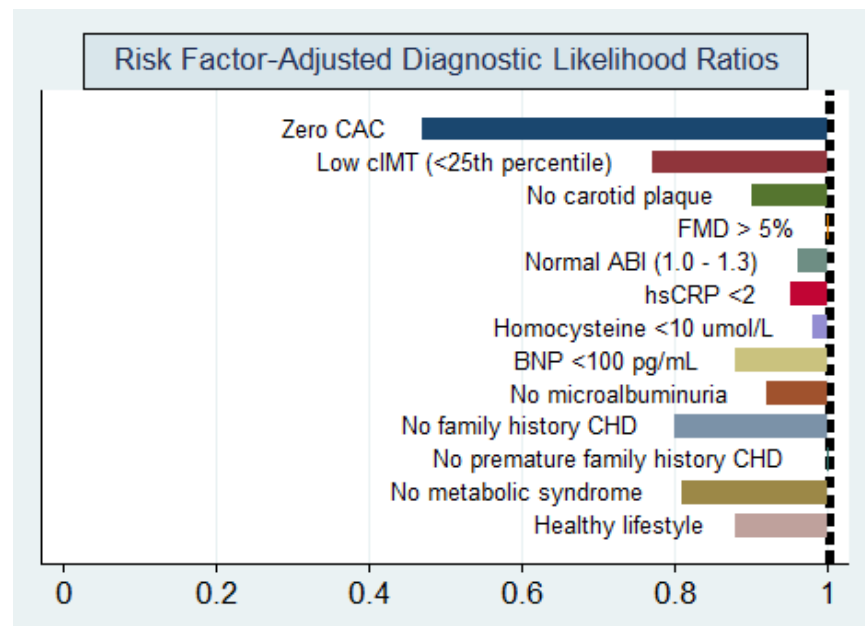

**Figure S6.** Risk factor-adjusted diagnostic likelihood ratios of different negative risk markers for coronary heart disease events (all) (A) and cardiovascular disease events (B) in a 60-year-old White man, smoker, SBP 135mmHg on medication, non-diabetic, HDL-cholesterol 40mg/dL, total cholesterol 200mg/dL.

**S6.A)** Coronary heart disease events (all)

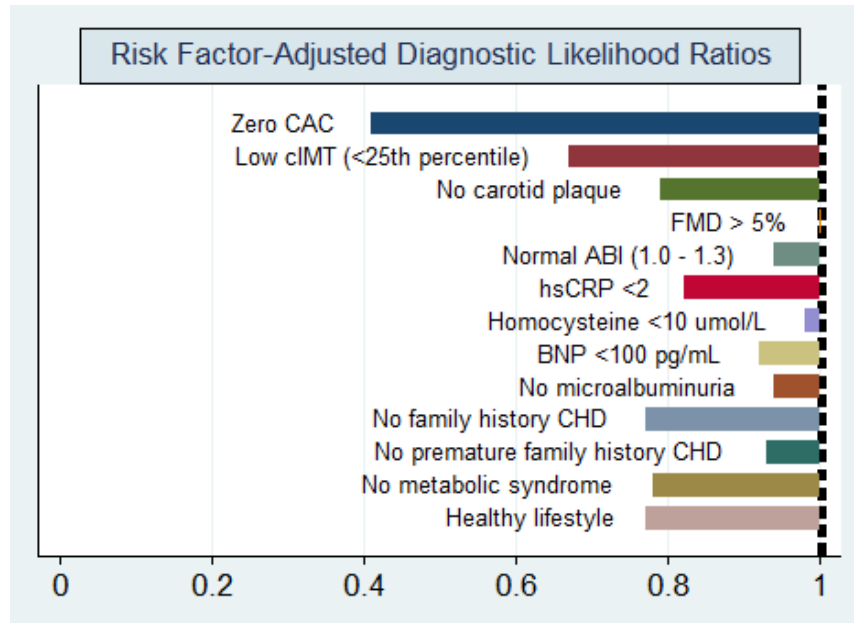

**S6.B)** Cardiovascular disease events

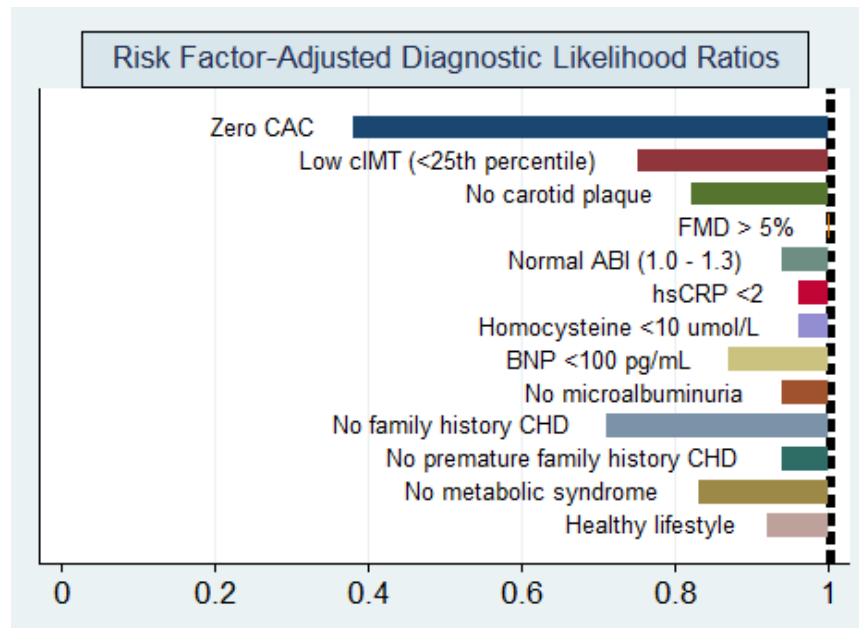



**Figure S7.** Risk factor-adjusted diagnostic likelihood ratios of different negative risk markers for coronary heart disease events (all) (A) and cardiovascular disease events (B) in a 65-year-old Hispanic woman, current smoker, SBP 160mmHg on medication, non-diabetic, HDL-cholesterol 45mg/dL, total cholesterol 220mg/dL.

**S7.A)** Coronary heart disease events (all)

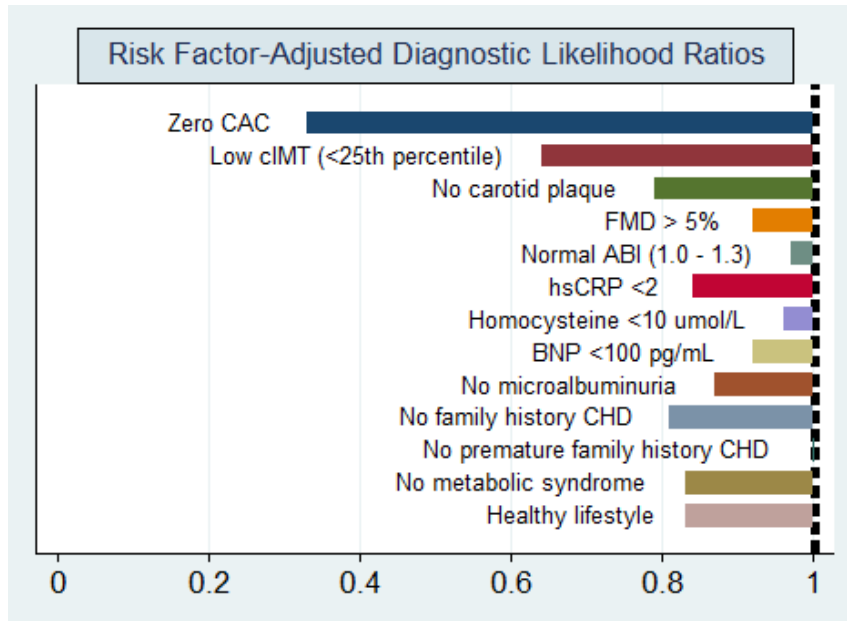

**S7.B)** Cardiovascular disease events

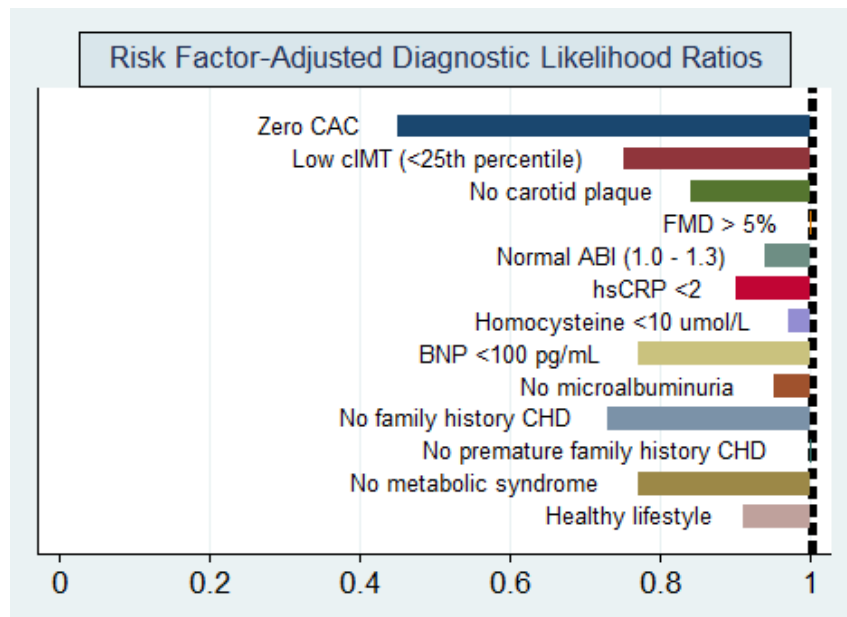

**Figure S8.** Risk factor-adjusted diagnostic likelihood ratios of different negative risk markers for coronary heart disease events (all) (A) and cardiovascular disease events (B) in a 75-year-old African American man, non-smoker, SBP 145mmHg on medication, non-diabetic, HDL-cholesterol 40mg/dL, total cholesterol 230 mg/dL.

**S8.A)** Coronary heart disease events (all)

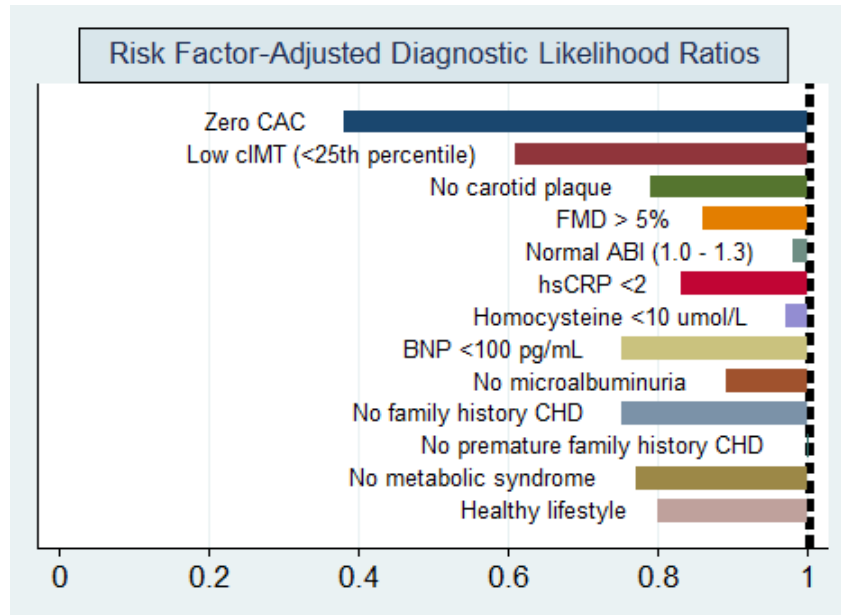

**S8.B)** Cardiovascular disease events

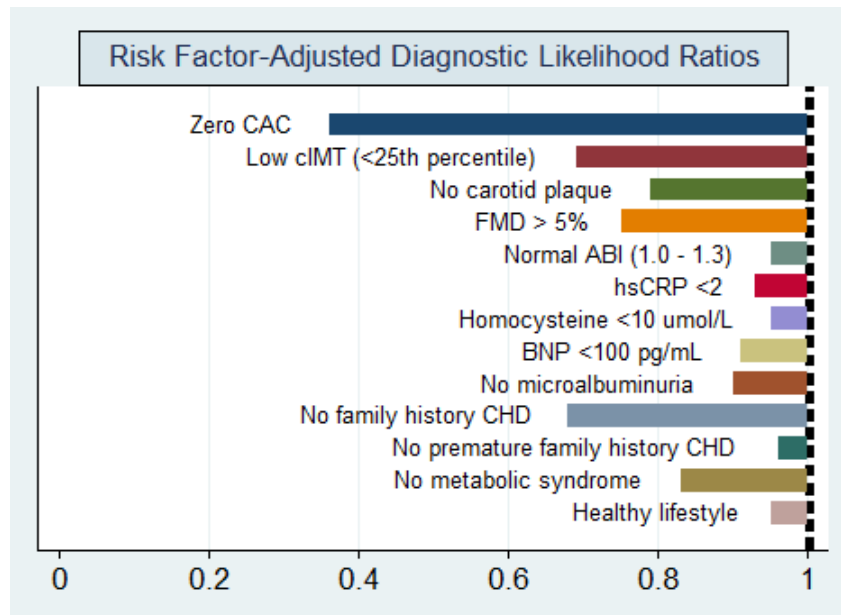

**Figure S9.** Risk factor-adjusted diagnostic likelihood ratios of different negative risk markers for coronary heart disease events (all) (A) and cardiovascular disease events (B) in a 65-year-old African American man, non-smoker, SBP 140mmHg on medication, diabetic, HDL-cholesterol 40mg/dL, total cholesterol 210 mg/dL.

**S9.A)** Coronary heart disease events (all)

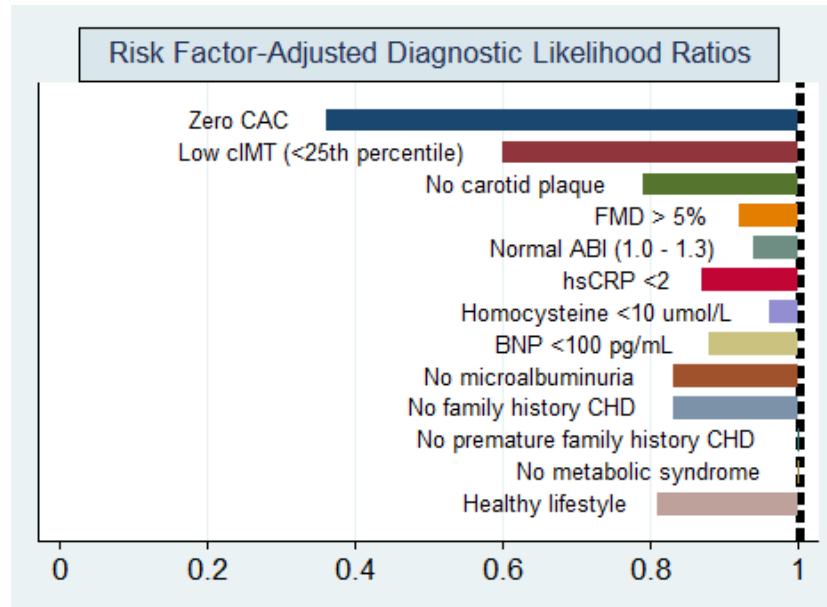

**S9.B)** Cardiovascular disease events

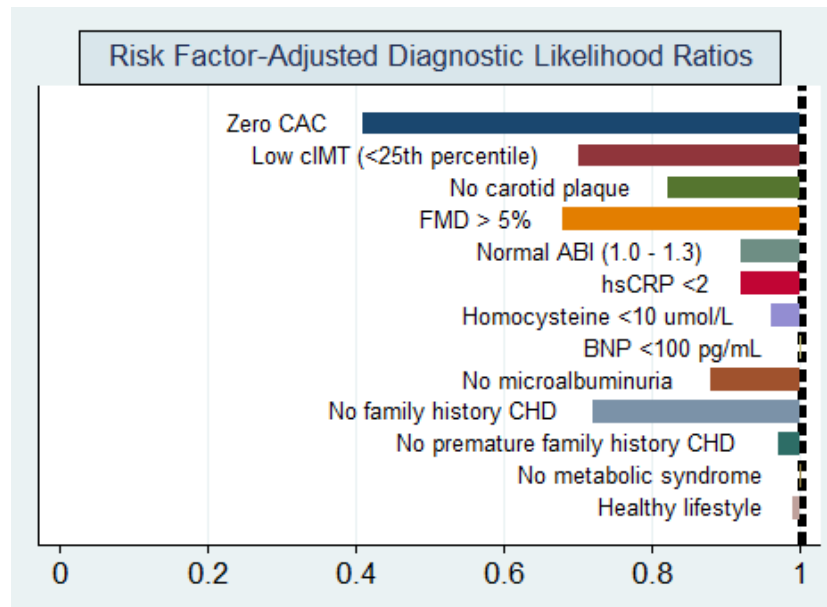

## **Supplementary Methods**

## **Measurement Reliability in MESA**

### **Coronary Artery Calcium Scores**

Kappa statistic for inter-observer agreement for the presence of CAC was 0.92.

### **Carotid Intima-Media Thickness**

Blinded repeated readings completed by two readers yielded between-reader correlation coefficients (CC) of 0.84 and 0.86, respectively.

### **Carotid Plaque**

Intra-reader and inter-reader Kappa statistics were 0.83 [95% CI 0.70–0.96] and 0.89 [0.72–1.00], respectively).

### **Flow Mediated Dilation**

Intra-reader intra-class CC were 0.99 for baseline and maximum diameters, and 0.93 for percent FMD. Intra-participant intra-class CC were 0.90, 0.90, and 0.54, respectively.

### **Ankle-Brachial Index**

The inter-reader and intra-reader CC were 0.845 and 0.937, respectively, and the intra-reader and inter-reader coefficients of variation (CV) were 5.14% and 3.27%, respectively.

### **High Sensitivity C-Reactive Protein**

The analytical intra-assay CVs ranged from 2.3 to 4.4%, and the inter-assay CVs from 2.1 to 5.7%.

**Homocysteine**

The CVs ranged 3.8–5.1%.

**NT-ProBNP**

The intra-assay and inter-assay CVs were 1.3% and 4.8%, respectively.

**Urine albumin**

The minimum detectable level of albumin is 0.2 mg/dL, and the normal reference range is <1.9 mg/dL.
